# Supplementary material for: Analysis of Host–Parasite Incongruence in Papillomavirus Evolution Using Importance Sampling
Source: PubMed Central journal article supplement — Mol Biol Evol. 2010 Jan 21;27(6):1301–14. doi: 10.1093/molbev/msq015 (PMC2872622; doi:10.1093/molbev/msq015), 2010-01-21
Supplement: msq015_1.pdf [file msq015_1.pdf]

## Supplementary Tables

**Table 1: List of PV types included in our analyses**

| Host species | PV Type   | PV Genus-Species | GenBank Accession Numbers |
|--------------|-----------|------------------|---------------------------|
| Human        | HPV32     | $\alpha$ -1      | X74475                    |
|              | HPV10     | $\alpha$ -2      | X74465                    |
|              | HPV28     | $\alpha$ -2      | U31783                    |
|              | HPV29     | $\alpha$ -2      | U31784                    |
|              | HPV77     | $\alpha$ -2      | Y15175                    |
|              | HPV94a    | $\alpha$ -2      | AJ620211                  |
|              | HPV94a    | $\alpha$ -2      | AJ620211                  |
|              | HPV61     | $\alpha$ -3      | U31793                    |
|              | candHPV62 | $\alpha$ -3      | AY395706                  |
|              | HPV72     | $\alpha$ -3      | X94164                    |
|              | HPV83     | $\alpha$ -3      | AF151983                  |
|              | HPV84     | $\alpha$ -3      | AF293960                  |
|              | candHPV86 | $\alpha$ -3      | AF349909                  |
|              | candHPV87 | $\alpha$ -3      | AJ400628                  |
|              | candHPV89 | $\alpha$ -3      | AF436128                  |
|              | HPV102    | $\alpha$ -3      | DQ080083                  |
|              | HPV27     | $\alpha$ -4      | X74473                    |
|              | HPV57     | $\alpha$ -4      | X55965                    |
|              | HPV106    | $\alpha$ -4      | DQ080082                  |
|              | HPV26     | $\alpha$ -5      | X74472                    |
|              | HPV69     | $\alpha$ -5      | AB027020                  |
|              | HPV82     | $\alpha$ -5      | AB027021                  |
|              | HPV30     | $\alpha$ -6      | X74474                    |
|              | HPV66     | $\alpha$ -6      | U31794                    |
|              | HPV18     | $\alpha$ -7      | X05015                    |
|              | HPV39     | $\alpha$ -7      | M62849                    |
|              | HPV45     | $\alpha$ -7      | X74479                    |
|              | HPV59     | $\alpha$ -7      | X77858                    |
|              | HPV68a    | $\alpha$ -7      | DQ080079                  |
|              | HPV70     | $\alpha$ -7      | U21941                    |
|              | candHPV85 | $\alpha$ -7      | AF131950                  |
|              | HPV97     | $\alpha$ -7      | DQ080080                  |
|              | HPV7      | $\alpha$ -8      | X74463                    |
|              | HPV40     | $\alpha$ -8      | X74478                    |
|              | HPV43     | $\alpha$ -8      | AJ620205                  |
|              | candHPV91 | $\alpha$ -8      | AF419318                  |
|              | HPV16     | $\alpha$ -9      | K02718                    |
|              | HPV31     | $\alpha$ -9      | J04353                    |
|              | HPV33     | $\alpha$ -9      | M12732                    |
|              | HPV35     | $\alpha$ -9      | M74117                    |
|              | HPV52     | $\alpha$ -9      | X74481                    |

**Table 1**  
**Continued**

| Host species | PV Type   | PV Genus-Species | GenBank Accession Numbers |
|--------------|-----------|------------------|---------------------------|
| Human        | HPV58     | $\alpha$ -9      | D90400                    |
|              | HPV67     | $\alpha$ -9      | D21208                    |
|              | HPV6      | $\alpha$ -10     | AF092932                  |
|              | HPV6b     | $\alpha$ -10     | X00203                    |
|              | HPV11     | $\alpha$ -10     | M14119                    |
|              | HPV13     | $\alpha$ -10     | DQ344807                  |
|              | HPV44     | $\alpha$ -10     | U31788                    |
|              | HPV34     | $\alpha$ -11     | X74476                    |
|              | HPV73     | $\alpha$ -11     | X94165                    |
|              | HPV54     | $\alpha$ -13     | U37488                    |
|              | HPV5      | $\beta$ -1       | M17463                    |
|              | HPV5b     | $\beta$ -1       | D90252                    |
|              | HPV12     | $\beta$ -1       | X74466                    |
|              | HPV19     | $\beta$ -1       | X74470                    |
|              | HPV20     | $\beta$ -1       | U31778                    |
|              | HPV21     | $\beta$ -1       | U31779                    |
|              | HPV24     | $\beta$ -1       | U31782                    |
|              | HPV25     | $\beta$ -1       | X74471                    |
|              | HPV36     | $\beta$ -1       | U31785                    |
|              | HPV93     | $\beta$ -1       | AY382778                  |
|              | RTRX7     | $\beta$ -1       | U85660                    |
|              | HPV9      | $\beta$ -2       | X74464                    |
|              | HPV15     | $\beta$ -2       | X74468                    |
|              | HPV17     | $\beta$ -2       | X74469                    |
|              | HPV22     | $\beta$ -2       | U31780                    |
|              | HPV23     | $\beta$ -2       | U31781                    |
|              | HPV37     | $\beta$ -2       | U31786                    |
|              | HPV38     | $\beta$ -2       | U31787                    |
|              | HPV80     | $\beta$ -2       | Y15176                    |
|              | HPV49     | $\beta$ -3       | X74480                    |
|              | HPV75     | $\beta$ -3       | Y15173                    |
|              | HPV76     | $\beta$ -3       | Y15174                    |
|              | candHPV92 | $\beta$ -4       | AF531420                  |
|              | candHPV96 | $\beta$ -5       | AY382779                  |
|              | HPV4      | $\gamma$ -1      | X70827                    |
|              | HPV65     | $\gamma$ -1      | X70829                    |
|              | HPV95     | $\gamma$ -1      | AJ620210                  |
|              | HPV48     | $\gamma$ -2      | U31789                    |
|              | HPV50     | $\gamma$ -3      | U31790                    |
|              | HPV60     | $\gamma$ -4      | U31792                    |
|              | HPV63     | $\mu$            | X70828                    |
|              | HPV41     | $\nu$            | X56147                    |

**Table 1**  
**Continued**

| Host species                    | PV Type  | PV Genus-Species | GenBank Accession Numbers |          |
|---------------------------------|----------|------------------|---------------------------|----------|
| Pygmy chimpanzee (Bonobo)       | PcPV     | $\alpha$ -10     | X62844                    |          |
| Common Chimpanzee               | CCPV1    | $\alpha$ -10     | AF020905                  |          |
| Rhesus Monkey                   | RhPV1    | $\alpha$ -12     | M60184                    |          |
| Micromys minutus (Muridae)      | MmPV     | $\pi$            | DQ269468                  |          |
| Mastomys coucha (Muridae)       | McPV2    | $\pi$            | DQ664501                  |          |
| Cotton tail Rabbit              | CRPVb    | $\kappa$         | AJ243287                  |          |
| European Rabbit (Domestic)      | ROPV     | $\kappa$         | AF227240                  |          |
| Porcupine                       | EdPV1    | $\sigma$         | AY684126                  |          |
| Bovine                          | BPV1     | $\epsilon$       | X02346                    |          |
|                                 | BPV2     | $\epsilon$       | M20219                    |          |
|                                 | BPV3     | $\xi$            | AF486184                  |          |
|                                 | BPV5     | $\delta$         | AJ620206                  |          |
|                                 | BPV7     | unclassified     | DQ217793                  |          |
|                                 | BPV8     | $\delta$         | DQ098913                  |          |
|                                 | BPV9     | $\xi$            | AB331650                  |          |
|                                 | BPV10    | $\xi$            | AB331651                  |          |
|                                 | Deer     | DPV              | $\epsilon$                | M11910   |
|                                 | Reindeer | RPV              | $\epsilon$                | AF443292 |
| European Elk                    | EePV     | $\epsilon$       | M15953                    |          |
| Phocoena spinipinnis (porpoise) | PsPV     | $\omicron$       | AJ238373                  |          |
| Tursiops truncatus (dolphin)    | TtPV2    | unclassified     | AY956402                  |          |
| Dog                             | CPV2     | unclassified     | AY722648                  |          |
|                                 | COPV     | $\lambda$        | D55633                    |          |
| Raccoon                         | PIPV1    | $\lambda$        | AY763115                  |          |
| Cat                             | FdPV     | $\lambda$        | AF480454                  |          |
| Parrot                          | PePV     | $\theta$         | AF502599                  |          |

**Table 2: Harmonic mean and 95% confidence interval (CI) of corrected log likelihood ( $LL_{\text{corr}}$ ) values from partitioned BEAST analysis measuring topological congruity of PV genes.**

|       | $LL_{\text{corr}}$ (gene topologies constrained) | $LL_{\text{corr}}$ (gene topologies unconstrained) | $\Delta LL_{\text{corr}}$ |
|-------|--------------------------------------------------|----------------------------------------------------|---------------------------|
| E1-E2 | 12.52 (11.43,19.23)                              | 68.32 (67.21,73.89)                                | 55.80                     |
| E1-L1 | 17.50 (16.41,26.11)                              | 224.77 (223.74,227.58)                             | 207.27                    |
| E1-L2 | 12.80 (11.71,22,22)                              | 277.06 (275.96,284.81)                             | 264.26                    |
| E2-L1 | 18.89 (17.85,22.15)                              | 90.69 (89.60,99.44)                                | 71.80                     |
| E2-L2 | 12.44 (11.35,18.10)                              | 122.23 (121.13,136.33)                             | 109.79                    |
| L1-L2 | 20.43 (19.33,29.50)                              | 126.57 (125.47,136.67)                             | 106.14                    |
| E6-E1 | 13.41 (12.41,18.34)                              | 65.99 (65.18,68.70)                                | 52.58                     |
| E6-E2 | 15.43 (14.34,22.69)                              | 81.38 (80.47,83.48)                                | 65.95                     |
| E6-E7 | 12.91 (12.22,14.28)                              | 49.66 (48.57,59.20)                                | 36.75                     |
| E6-L1 | 14.59 (13.63,17.42)                              | 110.85 (109.75,119.76)                             | 96.26                     |
| E6-L2 | 16.42 (15.39,19.45)                              | 111.17 (110.07,126.93)                             | 94.75                     |
| E7-E1 | 11.61 (10.80,14.78)                              | 34.19 (33.28,42.49)                                | 22.58                     |
| E7-E2 | 13.70 (12.76,21.68)                              | 34.80 (33.71,44.49)                                | 21.10                     |
| E7-L1 | 10.33 (9.24,17.03)                               | 64.46 (63.36,71.74)                                | 54.13                     |
| E7-L2 | 13.46 (12.51,16.58)                              | 66.88 (65.78,79.15)                                | 53.42                     |

**Table 3: Host speciation times used to sample PV divergence times**

| Super-order                                  | Order                        | Host divergence                               | Host speciation time (mya) |
|----------------------------------------------|------------------------------|-----------------------------------------------|----------------------------|
| Euarchontoglires                             | Primates                     | Chimp-Bonobo                                  | 3.4-5.5                    |
|                                              |                              | Human-(Chimp/Bonobo)                          | 7.8-9.5                    |
|                                              |                              | Human-Monkey                                  | 19.0-31.8                  |
|                                              | Glires                       | Muridae: M. coucha-M. minutus                 | 25.9-31.9                  |
|                                              |                              | Cotton tail rabbit-European (Domestic) rabbit | 19.0-31.8                  |
|                                              | Primates-Glires <sup>a</sup> |                                               | 90.0-93.8                  |
| Laurasiatheria                               | Carnivora                    | Cat-(Dog/Raccoon)                             | 59.8-67.1                  |
|                                              |                              | Dog-Raccoon                                   | 53.2-59.8                  |
|                                              | Cetacea                      | Dolphin-Porpoise                              | 27.8-32.1                  |
|                                              | Cervidae                     | Deer-(Elk/Roe deer)                           | 14.7-18.5                  |
|                                              |                              | Elk-Roe deer                                  | 14.0-16.8                  |
|                                              | Ruminantia                   | Cervidae-Bovine                               | 24.3-31.9                  |
|                                              | Cetartiodactyla <sup>b</sup> | Cetacea-Ruminantia                            | 59.2-63.9                  |
| Carnivora-Cetartiodactyla                    |                              | 83-85.8                                       |                            |
| Euarchontoglires-Laurasiatheria <sup>b</sup> |                              |                                               | 92.9-98.4                  |

<sup>a</sup> The Primates-Glires speciation time was applied to PV splits of human-rabbit, human-porcupine, human ( $\gamma$ )-Muridae.

<sup>b</sup> The Cetartiodactyla speciation time was applied to the divergence of the Cetacean PVs and the  $\xi$  BPVs in the L1 tree only.

<sup>c</sup> The Euarchontoglires-Laurasiatheria speciation time was applied to PV splits of human-rabbit-Carnivora, human ( $\gamma$ )-bovine, human ( $\gamma$ )-dog, Muridae-bovine, Muridae-dog, human ( $\gamma$ )-Muridae-bovine-dog, Primate-Cetacea (E1 only), human ( $\beta$ )-bovine (E1 only).

**Table 4: Observed distribution of diversification mechanisms at PV divergences of the E1 and L1 genes from the biased sampling analyses run independently with likelihood penalties of  $\ln(0.05)$  and  $\ln(0.005)$  for violations of host-speciation times.**

| E1 gene PV divergence ( $\ln(0.05)$ ) | Prior divergence | Co-speciation | Host switch |
|---------------------------------------|------------------|---------------|-------------|
| Chimp-Bonobo                          | 0.60             | 99.22         | 0.18        |
| Human-Chimp-Bonobo                    | 5.66             | 93.77         | 0.57        |
| Human-Monkey                          | 100**            | 0             | 0           |
| Dolphin-Porpoise                      | 100**            | 0             | 0           |
| Primate-Cetacea                       | 24.30            | 74.98         | 0.72        |
| Rabbit:Cotton tail-European           | 88.86**          | 11.14         | 0           |
| Human-Rabbits                         | 1.27             | 70.72         | 28.00       |
| Cat-Dog                               | 0.25             | 95.48         | 4.27        |
| Cat-Raccoon                           | 0.03             | 93.03         | 6.94        |
| Dog-Raccoon                           | 6.60             | 90.91         | 2.48        |
| Human-Rabbits-Carnivora               | 10.38*           | 88.73         | 0.89        |
| Human (beta)-Bovine                   | 2.92             | 93.69         | 3.39        |
| Muridae: <i>M.coucha-M.minutus</i>    | 91.31**          | 8.69          | 0           |
| Human-Muridae                         | 11.65            | 88.15         | 0.20        |
| Human-Bovine                          | 0.05             | 99.18         | 0.77        |
| Human-Dog                             | 0.05             | 99.18         | 0.77        |
| Bovine-Dog                            | 3.42             | 88.23         | 8.35        |
| Bovine-Muridae                        | 0                | 2.63          | 97.37       |
| Dog-Muridae                           | 0                | 2.79          | 97.21       |
| Human-Porcupine                       | 2.81             | 40.21         | 56.98       |
| Elk-Roe deer                          | 88.69**          | 11.30         | 0.01        |
| Cervidae                              | 100**            | 0             | 0           |
| Cervidae-Bovidae                      | 100**            | 0             | 0           |

  

| E1 gene PV divergence ( $\ln(0.005)$ ) | Prior divergence | Co-speciation | Host switch |
|----------------------------------------|------------------|---------------|-------------|
| Chimp-Bonobo                           | 0.35             | 99.56         | 0.09        |
| Human-Chimp-Bonobo                     | 3.21             | 96.49         | 0.30        |
| Human-Monkey                           | 100**            | 0             | 0           |
| Dolphin-Porpoise                       | 100*             | 0             | 0           |
| Primate-Cetacea                        | 13.41            | 86.24         | 0.35        |
| Rabbit:Cotton tail-European            | 64.52            | 35.48         | 0           |
| Human-Rabbits                          | 0.70             | 82.73         | 16.57       |
| Cat-Dog                                | 0.17             | 98.05         | 1.78        |
| Cat-Raccoon                            | 0.02*            | 96.80         | 3.18        |
| Dog-Raccoon                            | 3.76             | 94.82         | 1.42        |
| Human-Rabbits-Carnivora                | 5.84*            | 93.68         | 0.48        |
| Human (beta)-Bovine                    | 1.45             | 96.62         | 1.92        |
| Muridae: <i>M.coucha-M.minutus</i>     | 71.27**          | 28.73         | 0           |
| Human-Muridae                          | 8.05             | 91.27         | 0.69        |
| Human-Bovine                           | 0                | 99.60         | 0.40*       |
| Human-Dog                              | 0                | 99.60         | 0.40*       |
| Bovine-Dog                             | 2.00             | 93.46         | 4.55        |
| Bovine-Muridae                         | 0                | 22.48         | 77.52       |
| Dog-Muridae                            | 0                | 22.56         | 77.44       |
| Human-Porcupine                        | 2.02             | 62.58         | 35.40       |
| Elk-Roe deer                           | 60.33**          | 39.66         | 0.01        |
| Cervidae                               | 100**            | 0             | 0           |
| Cervidae-Bovidae                       | 100**            | 0             | 0           |

**Table 4**  
**Continued**

| L1 gene PV divergence (ln(0.05))   | Prior divergence | Co-speciation | Host switch |
|------------------------------------|------------------|---------------|-------------|
| Chimp-Bonobo                       | 0.27             | 99.06         | 0.66        |
| Human-Chimp-Bonobo                 | 10.83            | 88.83         | 0.35        |
| Human-Monkey                       | 99.50**          | 0.50          | 0           |
| Dolphin-Porpoise                   | 100*             | 0             | 0           |
| Rabbit:Cotton tail-European        | 95.75**          | 4.25          | 0           |
| Human-Rabbit                       | 2.61             | 75.84         | 21.56       |
| Cat-Dog                            | 0                | 0.44          | 99.56       |
| Dog-Raccoon                        | 33.12            | 64.09         | 2.79        |
| Human,Rabbit-Carnivora             | 21.80*           | 77.42         | 0.78        |
| Cetacea-Bovine                     | 100**            | 0             | 0           |
| Muridae: <i>M.coucha-M.minutus</i> | 20.30            | 79.29         | 0.42        |
| Human-Muridae                      | 1.03             | 88.90         | 10.07       |
| Human-Bovine                       | 0                | 99.99         | 0.01        |
| Human-Dog                          | 0                | 99.96         | 0.04        |
| Bovine-Dog                         | 4.65             | 80.82         | 14.53       |
| Bovine-Muridae                     | 0                | 99.94         | 0.06        |
| Dog-Muridae                        | 0                | 99.99         | 0.01        |
| Human-Porcupine                    | 0                | 0             | 100*        |
| Elk-Roe deer                       | 97.42**          | 2.58          | 0           |
| Cervidae                           | 100**            | 0             | 0           |
| Cervidae-Bovidae                   | 100**            | 0             | 0           |

| L1 gene PV divergence ln((0.005))  | Prior divergence | Co-speciation | Host switch |
|------------------------------------|------------------|---------------|-------------|
| Chimp-Bonobo                       | 0.02             | 99.89**       | 0.09        |
| Human-Chimp-Bonobo                 | 0.10             | 98.97         | 0.04        |
| Human-Monkey                       | 85.43*           | 14.57         | 0           |
| Dolphin-Porpoise                   | 100**            | 0             | 0           |
| Rabbit:Cotton tail-European        | 61.71**          | 38.29         | 0           |
| Human-Rabbits                      | 0.16             | 94.68         | 5.16        |
| Cat-Dog                            | 0                | 4.43          | 95.57       |
| Dog-Raccoon                        | 31.11            | 68.46         | 0.44        |
| Human-Rabbits-Carnivora            | 2.68*            | 97.27         | 0.05        |
| Cetacea-Bovine                     | 100**            | 0             | 0           |
| Muridae: <i>M.coucha-M.minutus</i> | 2.14             | 97.79         | 0.07        |
| Human-Muridae                      | 0.09             | 98.50         | 1.42        |
| Human-Bovine                       | 0                | 100           | 0           |
| Human-Dog                          | 0                | 100           | 0           |
| Bovine-Dog                         | 0.50             | 97.81**       | 1.69        |
| Bovine-Muridae                     | 0                | 100           | 0           |
| Dog-Muridae                        | 0                | 100           | 0           |
| Human-Porcupine                    | 0                | 0             | 100*        |
| Elk-Roe deer                       | 70.38**          | 29.61         | 0.01        |
| Cervidae                           | 98.50**          | 1.50          | 0           |
| Cervidae-Bovidae                   | 98.31**          | 1.69          | 0           |

\* indicates p-values < 0.05 obtained from the biased sampling analysis of simulated data generated under a model of co-speciation at each node. \*\* indicates p-values < 0.01 from this analysis.
